# Supplementary material for: The Recombinational Anatomy of a Mouse Chromosome
Source: PubMed Central journal article supplement (PMC2440539; doi:10.1371/journal.pgen.1000119), 2008-07-11
Supplement: pgen.1000119.s003.pdf [file pgen.1000119.s003.pdf]

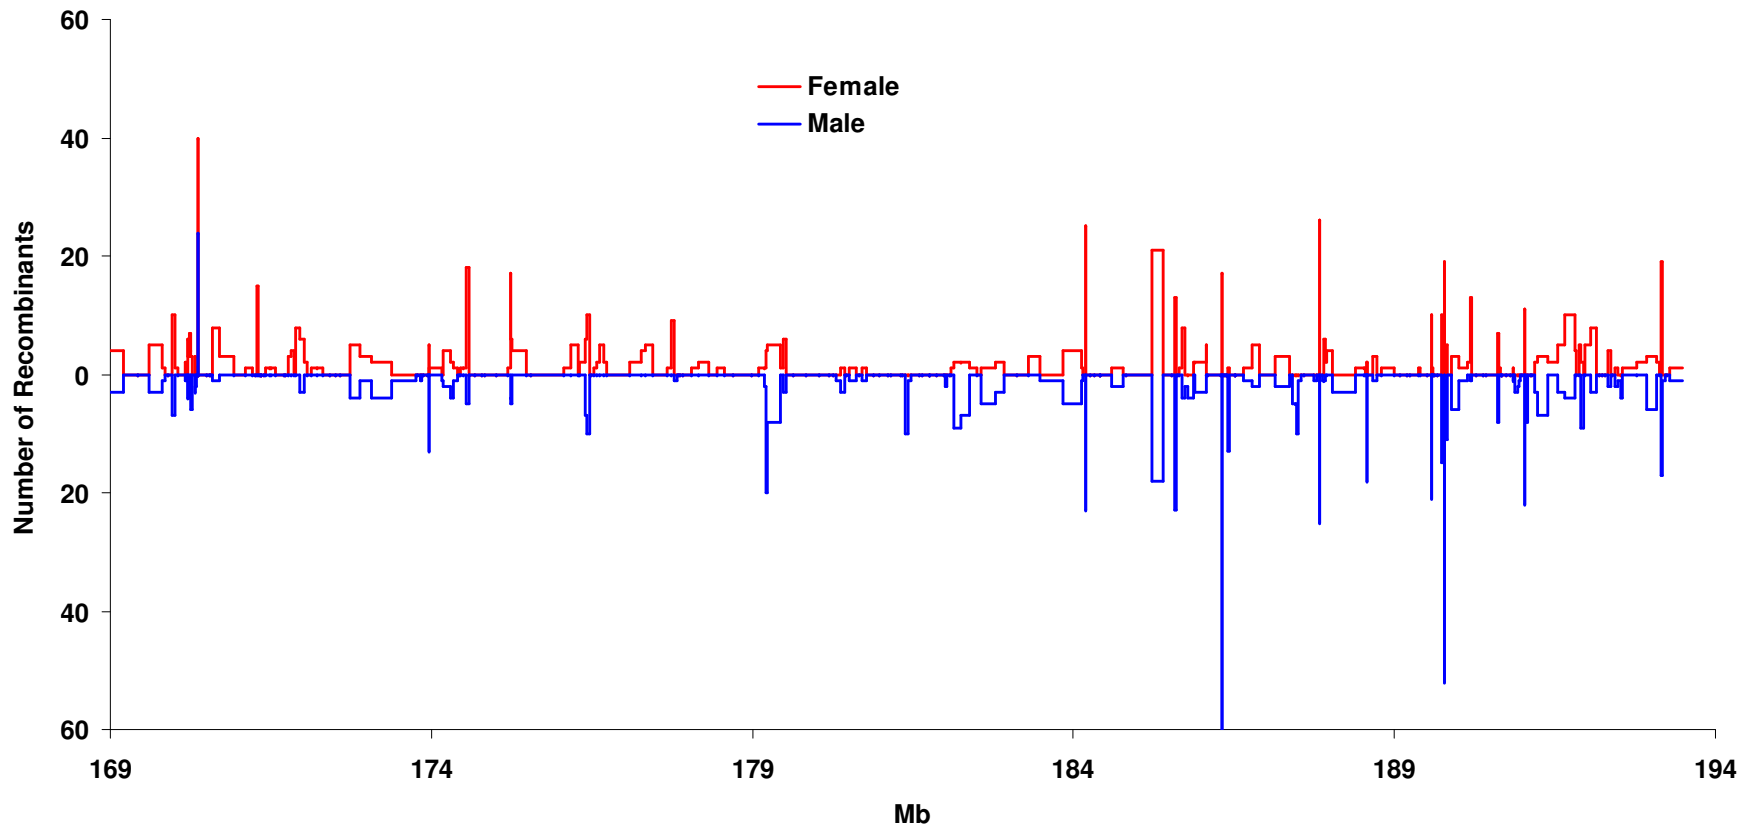

**Figure S3. Fine mapping of sex-specific recombination activities in the region of 168.8-193.5 on Chr 1.** The number of recombinants in each region is plotted to illustrate the resolution achieved.
